# Supplementary material
Source: Springer Nature journal article supplement (https://www.springermedizin.de/resource/supplementary/13054_2011_9732_MOESM1_ESM.pdf/9706896)

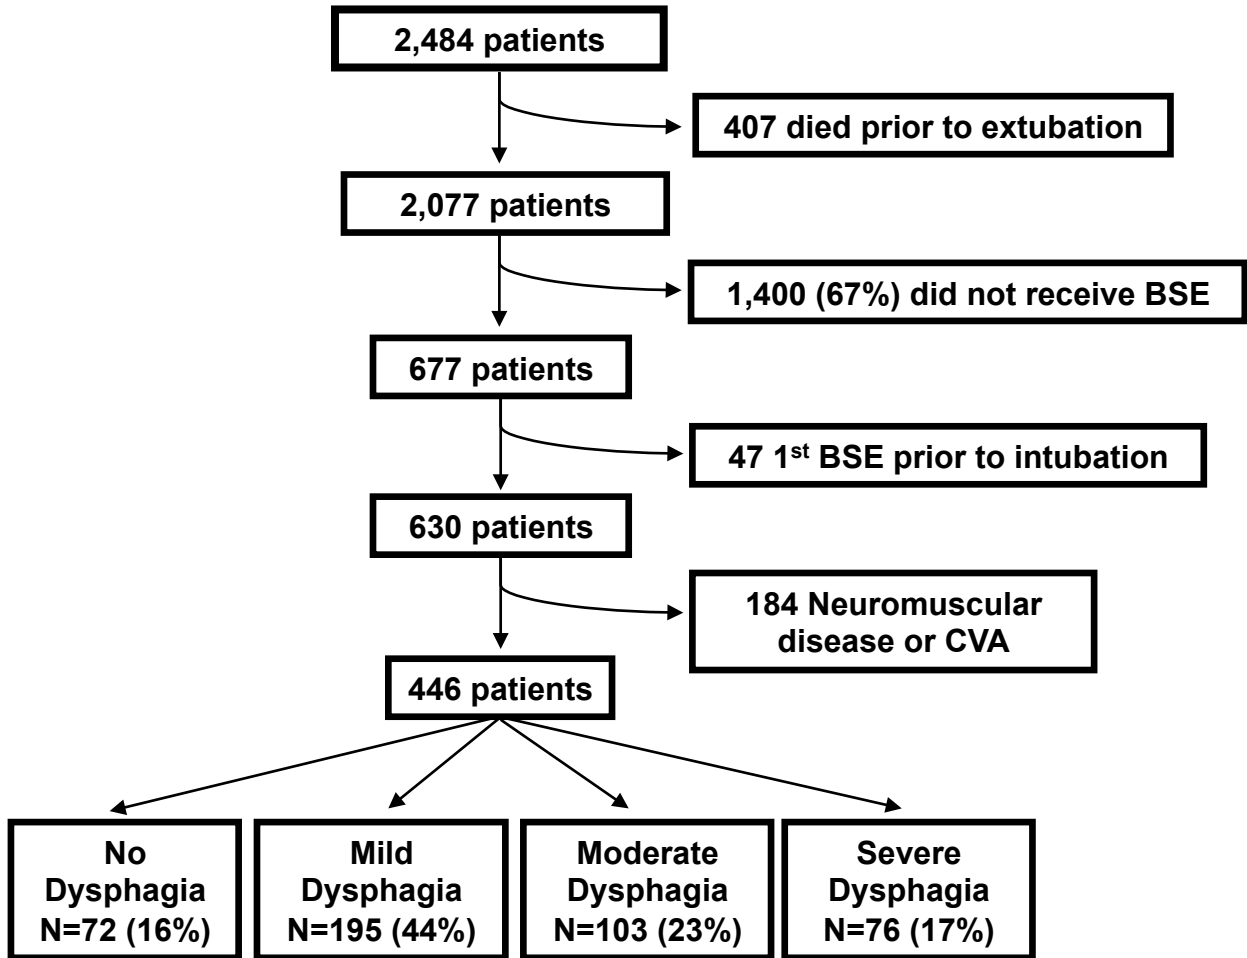

Supplement: MOESM1 [file 9706896]
